# Supplementary material for: Studies of the Anti-Diabetic Mechanism of Pueraria lobata Based on Metabolomics and Network Pharmacology
Source: MDPI journal article supplement (doi:10.3390/pr9071245), 2021-07-19

# Supplementary Tables and Figures

**Supplementary Table S1. A total of 256 chemical ingredients of *Pueraria lobata***

| Compounds                                     | m/z    | Rt (min) | Formula                                                         | Class                               |
|-----------------------------------------------|--------|----------|-----------------------------------------------------------------|-------------------------------------|
| L-Histidine                                   | 156.08 | 0.69     | C <sub>6</sub> H <sub>9</sub> N <sub>3</sub> O <sub>2</sub>     | Carboxylic acids and derivatives    |
| Acacetin                                      | 283.06 | 4.44     | C <sub>16</sub> H <sub>12</sub> O <sub>5</sub>                  | Flavonoids                          |
| Traumatic Acid                                | 229.14 | 5.96     | C <sub>12</sub> H <sub>20</sub> O <sub>4</sub>                  | Fatty Acyls                         |
| Caffeic Acid                                  | 181.05 | 3.61     | C <sub>9</sub> H <sub>8</sub> O <sub>4</sub>                    | Cinnamic acids and derivatives      |
| 1-Kestose                                     | 543.13 | 0.76     | C <sub>18</sub> H <sub>32</sub> O <sub>16</sub>                 | Organooxygen compounds              |
| Tyramine                                      | 138.09 | 1.13     | C <sub>8</sub> H <sub>11</sub> NO                               | Benzene and substituted derivatives |
| L-Glutamate                                   | 295.11 | 0.76     | C <sub>5</sub> H <sub>9</sub> NO <sub>4</sub>                   | Carboxylic acids and derivatives    |
| (+)-Absciscic Acid                            | 247.13 | 5.18     | C <sub>15</sub> H <sub>20</sub> O <sub>4</sub>                  | Prenol lipids                       |
| 8-HETE                                        | 338.27 | 8.99     | C <sub>20</sub> H <sub>32</sub> O <sub>3</sub>                  | Fatty Acyls                         |
| D-Glutamine                                   | 147.08 | 0.76     | C <sub>5</sub> H <sub>10</sub> N <sub>2</sub> O <sub>3</sub>    | Carboxylic acids and derivatives    |
| Sucrose                                       | 381.08 | 0.76     | C <sub>12</sub> H <sub>22</sub> O <sub>11</sub>                 | Organooxygen compounds              |
| Tangeritin                                    | 373.13 | 7.52     | C <sub>20</sub> H <sub>20</sub> O <sub>7</sub>                  | Flavonoids                          |
| trans-2,3-Dihydroxycinnamate                  | 181.05 | 3.82     | C <sub>9</sub> H <sub>8</sub> O <sub>4</sub>                    | Cinnamic acids and derivatives      |
| Astragalin                                    | 447.09 | 4.35     | C <sub>21</sub> H <sub>20</sub> O <sub>11</sub>                 | Flavonoids                          |
| Peonidin 3-O-glucoside                        | 463.12 | 4.53     | C <sub>22</sub> H <sub>22</sub> O <sub>11</sub>                 | Flavonoids                          |
| Diosmetin                                     | 299.06 | 5.79     | C <sub>16</sub> H <sub>12</sub> O <sub>6</sub>                  | Flavonoids                          |
| Pantothenic Acid                              | 220.12 | 2.33     | C <sub>9</sub> H <sub>17</sub> NO <sub>5</sub>                  | Alcohols and polyols                |
| 3-Cresotinic acid                             | 151.04 | 3.77     | C <sub>8</sub> H <sub>8</sub> O <sub>3</sub>                    | Benzene and substituted derivatives |
| Glycitin                                      | 447.13 | 5.08     | C <sub>22</sub> H <sub>22</sub> O <sub>10</sub>                 | Isoflavonoids                       |
| 5' -Deoxy-5'-(methylthio)-adenosine           | 298.10 | 3.37     | C <sub>11</sub> H <sub>15</sub> N <sub>5</sub> O <sub>3</sub> S | 5'-deoxyribonucleosides             |
| 13R-HODE                                      | 297.24 | 9.72     | C <sub>18</sub> H <sub>32</sub> O <sub>3</sub>                  | Fatty Acyls                         |
| Formononetin                                  | 267.07 | 6.26     | C <sub>16</sub> H <sub>12</sub> O <sub>4</sub>                  | Isoflavonoids                       |
| KOJIC ACID                                    | 143.03 | 1.16     | C <sub>6</sub> H <sub>6</sub> O <sub>4</sub>                    | Pyrans                              |
| 9-OxoODE                                      | 295.23 | 7.66     | C <sub>18</sub> H <sub>30</sub> O <sub>3</sub>                  | Fatty Acyls                         |
| Glechomafuran                                 | 249.15 | 8.19     | C <sub>15</sub> H <sub>20</sub> O <sub>3</sub>                  | Prenol lipids                       |
| Linoleic acid                                 | 281.25 | 9.41     | C <sub>18</sub> H <sub>32</sub> O <sub>2</sub>                  | Fatty Acyls                         |
| L-trans-5-Hydroxy-2-piperidinecarboxylic acid | 146.08 | 0.78     | C <sub>6</sub> H <sub>11</sub> NO <sub>3</sub>                  | Carboxylic acids and derivatives    |
| L-Arginine                                    | 175.12 | 0.70     | C <sub>6</sub> H <sub>14</sub> N <sub>4</sub> O <sub>2</sub>    | Carboxylic acids and derivatives    |
| Methylgingerol                                | 309.21 | 7.72     | C <sub>18</sub> H <sub>28</sub> O <sub>4</sub>                  | Benzene and substituted             |

|                                                       |        |      |                                                               |                                     |
|-------------------------------------------------------|--------|------|---------------------------------------------------------------|-------------------------------------|
|                                                       |        |      |                                                               | derivatives                         |
| Gentisic acid                                         | 153.02 | 2.39 | C <sub>7</sub> H <sub>6</sub> O <sub>4</sub>                  | Benzene and substituted derivatives |
| Colnelenic acid                                       | 293.21 | 6.22 | C <sub>18</sub> H <sub>28</sub> O <sub>3</sub>                | Fatty Acyls                         |
| N-(3S-hydroxy-butanoyl)-homoserine lactone            | 188.09 | 1.35 | C <sub>8</sub> H <sub>13</sub> NO <sub>4</sub>                | Fatty Acyls                         |
| 9S-hydroxy-12R,13S-epoxy-10E,15Z-octadecadienoic acid | 311.22 | 6.31 | C <sub>18</sub> H <sub>30</sub> O <sub>4</sub>                | Fatty Acyls                         |
| 13-OxoODE                                             | 295.23 | 6.53 | C <sub>18</sub> H <sub>30</sub> O <sub>3</sub>                | Fatty Acyls                         |
| 3-Aminosalicylic acid                                 | 152.03 | 3.39 | C <sub>7</sub> H <sub>7</sub> NO <sub>3</sub>                 | Benzene and substituted derivatives |
| Isoquercitrin                                         | 465.10 | 4.19 | C <sub>21</sub> H <sub>20</sub> O <sub>12</sub>               | Flavonoids                          |
| (-)-Naringenin                                        | 273.08 | 5.55 | C <sub>15</sub> H <sub>12</sub> O <sub>5</sub>                | Flavonoids                          |
| N-Acetyl-L-glutamic acid                              | 190.07 | 0.95 | C <sub>7</sub> H <sub>11</sub> NO <sub>5</sub>                | Carboxylic acids and derivatives    |
| L-Phenylalanine                                       | 164.07 | 1.93 | C <sub>9</sub> H <sub>11</sub> NO <sub>2</sub>                | Carboxylic acids and derivatives    |
| N-ACETYLPROLINE                                       | 156.07 | 2.36 | C <sub>7</sub> H <sub>11</sub> NO <sub>3</sub>                | Carboxylic acids and derivatives    |
| L-Lysine                                              | 147.11 | 0.68 | C <sub>6</sub> H <sub>14</sub> N <sub>2</sub> O <sub>2</sub>  | Carboxylic acids and derivatives    |
| ferulic acid                                          | 193.05 | 3.98 | C <sub>10</sub> H <sub>10</sub> O <sub>4</sub>                | Cinnamic acids and derivatives      |
| 12-oxo-5E,8E,10Z-dodecatricenoic acid                 | 209.12 | 5.10 | C <sub>12</sub> H <sub>16</sub> O <sub>3</sub>                | Fatty Acyls                         |
| Pregabalin                                            | 160.13 | 3.12 | C <sub>8</sub> H <sub>17</sub> NO <sub>2</sub>                | Carboxylic acids and derivatives    |
| MG(18:3(6Z,9Z,12Z)/0:0/0:0)                           | 353.27 | 8.31 | C <sub>21</sub> H <sub>36</sub> O <sub>4</sub>                | Fatty Acyls                         |
| 3-Hydroxyanthranilic acid                             | 154.05 | 2.83 | C <sub>7</sub> H <sub>7</sub> NO <sub>3</sub>                 | Benzene and substituted derivatives |
| 9(S)-HpODE                                            | 295.23 | 6.08 | C <sub>18</sub> H <sub>32</sub> O <sub>4</sub>                | Fatty Acyls                         |
| L-Tryptophan                                          | 203.08 | 3.32 | C <sub>11</sub> H <sub>12</sub> N <sub>2</sub> O <sub>2</sub> | Indoles and derivatives             |
| Caryophyllene epoxide                                 | 203.18 | 7.10 | C <sub>15</sub> H <sub>24</sub> O                             | Prenol lipids                       |
| Carbendazim                                           | 192.08 | 3.52 | C <sub>9</sub> H <sub>9</sub> N <sub>3</sub> O <sub>2</sub>   | Benzimidazoles                      |
| bicyclo-PGE2                                          | 335.22 | 7.39 | C <sub>20</sub> H <sub>30</sub> O <sub>4</sub>                | Fatty Acyls                         |
| Xanthine                                              | 151.03 | 1.04 | C <sub>5</sub> H <sub>4</sub> N <sub>4</sub> O <sub>2</sub>   | Imidazopyrimidines                  |
| (E)-4-Octenoic acid                                   | 143.11 | 7.58 | C <sub>8</sub> H <sub>14</sub> O <sub>2</sub>                 | Fatty Acyls                         |
| Traumatin                                             | 213.15 | 4.83 | C <sub>12</sub> H <sub>20</sub> O <sub>3</sub>                | Fatty Acyls                         |
| 2-Hydroxycinnamic acid                                | 163.04 | 4.20 | C <sub>9</sub> H <sub>8</sub> O <sub>3</sub>                  | Cinnamic acids and derivatives      |
| 5-Hydroxykynurenamine                                 | 181.10 | 4.38 | C <sub>9</sub> H <sub>12</sub> N <sub>2</sub> O <sub>2</sub>  | Organooxygen compounds              |
| Corchorifatty acid A                                  | 309.21 | 6.10 | C <sub>18</sub> H <sub>28</sub> O <sub>4</sub>                | Fatty Acyls                         |
| Diplodiatoxin                                         | 309.21 | 7.16 | C <sub>18</sub> H <sub>28</sub> O <sub>4</sub>                | Keto acids and                      |

|                                             |        |      |                                                               |                                     |
|---------------------------------------------|--------|------|---------------------------------------------------------------|-------------------------------------|
|                                             |        |      |                                                               | derivatives                         |
| Isoleucyl-Lysine                            | 260.20 | 1.20 | C <sub>12</sub> H <sub>25</sub> N <sub>3</sub> O <sub>3</sub> | Carboxylic acids and derivatives    |
| Nobiletin                                   | 403.14 | 6.99 | C <sub>21</sub> H <sub>22</sub> O <sub>8</sub>                | Flavonoids                          |
| 1-(Malonylamino)cyclopropanecarboxylic acid | 188.06 | 1.16 | C <sub>7</sub> H <sub>9</sub> NO <sub>5</sub>                 | Carboxylic acids and derivatives    |
| N-Benzoylaspartic acid                      | 238.07 | 3.91 | C <sub>11</sub> H <sub>11</sub> NO <sub>5</sub>               | Carboxylic acids and derivatives    |
| MG(0:0/18:3(6Z,9Z,12Z)/0:0)                 | 353.27 | 9.12 | C <sub>21</sub> H <sub>36</sub> O <sub>4</sub>                | Fatty Acyls                         |
| L-Theanine                                  | 175.11 | 1.40 | C <sub>7</sub> H <sub>14</sub> N <sub>2</sub> O <sub>3</sub>  | Carboxylic acids and derivatives    |
| 2,3-Dinor-TXB2                              | 343.21 | 5.59 | C <sub>18</sub> H <sub>30</sub> O <sub>6</sub>                | Fatty Acyls                         |
| (8)-Gingerol                                | 323.22 | 8.22 | C <sub>19</sub> H <sub>30</sub> O <sub>4</sub>                | Phenols                             |
| MG(0:0/18:4(6Z,9Z,12Z,15Z)/0:0)             | 351.25 | 8.85 | C <sub>21</sub> H <sub>34</sub> O <sub>4</sub>                | Fatty Acyls                         |
| Threoninyl-Isoleucine                       | 233.15 | 2.31 | C <sub>10</sub> H <sub>20</sub> N <sub>2</sub> O <sub>4</sub> | Carboxylic acids and derivatives    |
| 2-tridecene-4,7-diynal                      | 189.13 | 3.94 | C <sub>13</sub> H <sub>16</sub> O                             | Fatty Acyls                         |
| LysoPE(15:0/0:0)                            | 440.28 | 8.95 | C <sub>20</sub> H <sub>42</sub> NO <sub>7</sub> P             | Glycerophospholipids                |
| Megastigmatrienone                          | 381.28 | 7.99 | C <sub>13</sub> H <sub>18</sub> O                             | Organooxygen compounds              |
| Procyanidin B2                              | 577.14 | 3.49 | C <sub>30</sub> H <sub>26</sub> O <sub>12</sub>               | Flavonoids                          |
| 3S-aminodecanoic acid                       | 188.16 | 4.07 | C <sub>10</sub> H <sub>21</sub> NO <sub>2</sub>               | Fatty Acyls                         |
| 12-hydroxy-3Z,6Z-dodecadienoic acid         | 213.15 | 5.73 | C <sub>12</sub> H <sub>20</sub> O <sub>3</sub>                | Fatty Acyls                         |
| Hydrocortamate                              | 476.30 | 5.87 | C <sub>27</sub> H <sub>41</sub> NO <sub>6</sub>               | Steroids and steroid derivatives    |
| 2,3-Dihydroxybenzoic acid                   | 153.02 | 3.82 | C <sub>7</sub> H <sub>6</sub> O <sub>4</sub>                  | Benzene and substituted derivatives |
| 6,8,10,12-pentadecatetraenal                | 219.17 | 5.59 | C <sub>15</sub> H <sub>22</sub> O                             | Fatty Acyls                         |
| Glycyl-Isoleucine                           | 189.12 | 2.35 | C <sub>8</sub> H <sub>16</sub> N <sub>2</sub> O <sub>3</sub>  | Carboxylic acids and derivatives    |
| Isoferulic acid                             | 195.07 | 4.37 | C <sub>10</sub> H <sub>10</sub> O <sub>4</sub>                | Cinnamic acids and derivatives      |
| 6-methyl-5-heptenoic acid                   | 143.11 | 6.26 | C <sub>8</sub> H <sub>14</sub> O <sub>2</sub>                 | Fatty Acyls                         |
| Corchorifatty acid F                        | 351.21 | 6.52 | C <sub>18</sub> H <sub>32</sub> O <sub>5</sub>                | Fatty Acyls                         |
| pivaloylcarnitine                           | 246.17 | 2.93 | C <sub>12</sub> H <sub>23</sub> NO <sub>4</sub>               | Fatty Acyls                         |
| 7-Tridecynoic acid                          | 211.17 | 4.58 | C <sub>13</sub> H <sub>22</sub> O <sub>2</sub>                | Fatty Acyls                         |
| Soyasapogenol C                             | 441.37 | 9.72 | C <sub>30</sub> H <sub>48</sub> O <sub>2</sub>                | Prenol lipids                       |
| cis,cis-Muconic acid                        | 143.03 | 3.12 | C <sub>6</sub> H <sub>6</sub> O <sub>4</sub>                  | Fatty Acyls                         |
| Pimelic acid                                | 159.07 | 3.86 | C <sub>7</sub> H <sub>12</sub> O <sub>4</sub>                 | Fatty Acyls                         |
| N-Acetylleucine                             | 172.10 | 4.11 | C <sub>8</sub> H <sub>15</sub> NO <sub>3</sub>                | Carboxylic acids and derivatives    |
| (R)-3-Hydroxy-5-phenylpenta                 | 195.10 | 4.63 | C <sub>11</sub> H <sub>14</sub> O <sub>3</sub>                | Hydroxy acids and                   |

|                                              |        |      |                                                               |                                     |
|----------------------------------------------|--------|------|---------------------------------------------------------------|-------------------------------------|
| noic acid                                    |        |      |                                                               | derivatives                         |
| Momordicin I                                 | 473.36 | 7.96 | C <sub>30</sub> H <sub>48</sub> O <sub>4</sub>                | Steroids and steroid derivatives    |
| Isocitrate                                   | 191.02 | 1.04 | C <sub>6</sub> H <sub>8</sub> O <sub>7</sub>                  | Carboxylic acids and derivatives    |
| Hydroxyphenylacetyl glycine                  | 210.08 | 1.64 | C <sub>10</sub> H <sub>11</sub> NO <sub>4</sub>               | Carboxylic acids and derivatives    |
| 4,8 dimethylnonanoyl carnitine               | 330.26 | 3.52 | C <sub>18</sub> H <sub>35</sub> NO <sub>4</sub>               | Fatty Acyls                         |
| N-Malonylanthranilate                        | 224.06 | 4.36 | C <sub>10</sub> H <sub>9</sub> NO <sub>5</sub>                | Benzene and substituted derivatives |
| Dehydrovomifoliol                            | 223.13 | 6.02 | C <sub>13</sub> H <sub>18</sub> O <sub>3</sub>                | Prenol lipids                       |
| Isovalerylglutamic acid                      | 232.12 | 4.13 | C <sub>10</sub> H <sub>17</sub> NO <sub>5</sub>               | Carboxylic acids and derivatives    |
| 8-Tridecynoic acid                           | 211.17 | 5.44 | C <sub>13</sub> H <sub>22</sub> O <sub>2</sub>                | Fatty Acyls                         |
| Gingerol                                     | 295.19 | 8.38 | C <sub>17</sub> H <sub>26</sub> O <sub>4</sub>                | Phenols                             |
| Tocopheronic acid                            | 295.15 | 4.91 | C <sub>16</sub> H <sub>22</sub> O <sub>5</sub>                | Prenol lipids                       |
| L-Carnitine                                  | 162.11 | 0.78 | C <sub>7</sub> H <sub>15</sub> NO <sub>3</sub>                | Organonitrogen compounds            |
| 13-Oxo-9,11-tridecadienoic acid              | 225.15 | 3.99 | C <sub>13</sub> H <sub>20</sub> O <sub>3</sub>                | Fatty Acyls                         |
| Cinnassiol C3                                | 383.21 | 4.13 | C <sub>20</sub> H <sub>30</sub> O <sub>7</sub>                | Prenol lipids                       |
| N-Carboxyacetyl-D-phenylalanine              | 252.09 | 4.25 | C <sub>12</sub> H <sub>13</sub> NO <sub>5</sub>               | Carboxylic acids and derivatives    |
| Quercetin                                    | 301.04 | 5.07 | C <sub>15</sub> H <sub>10</sub> O <sub>7</sub>                | Flavonoids                          |
| 2-O-(Z-p-Hydroxycinnamoyl)-(x)-glyceric acid | 253.07 | 4.53 | C <sub>12</sub> H <sub>12</sub> O <sub>6</sub>                | Cinnamic acids and derivatives      |
| 6-[5]-ladderane-hexanoic acid                | 275.20 | 5.73 | C <sub>18</sub> H <sub>26</sub> O <sub>2</sub>                | Fatty Acyls                         |
| 2-Octenoic acid                              | 143.11 | 7.04 | C <sub>8</sub> H <sub>14</sub> O <sub>2</sub>                 | Fatty Acyls                         |
| Glycyl-L-leucine                             | 189.12 | 2.72 | C <sub>8</sub> H <sub>16</sub> N <sub>2</sub> O <sub>3</sub>  | Carboxylic acids and derivatives    |
| 3-hexenedioic acid                           | 145.05 | 0.81 | C <sub>6</sub> H <sub>8</sub> O <sub>4</sub>                  | Fatty Acyls                         |
| Threoninyl-Valine                            | 219.13 | 1.20 | C <sub>9</sub> H <sub>18</sub> N <sub>2</sub> O <sub>4</sub>  | Carboxylic acids and derivatives    |
| Seriny-Phenylalanine                         | 253.12 | 3.26 | C <sub>12</sub> H <sub>16</sub> N <sub>2</sub> O <sub>4</sub> | Carboxylic acids and derivatives    |
| beta-Ionone                                  | 193.16 | 9.09 | C <sub>13</sub> H <sub>20</sub> O                             | Prenol lipids                       |
| 4-Nitrophenol                                | 140.03 | 1.04 | C <sub>6</sub> H <sub>5</sub> NO <sub>3</sub>                 | Phenols                             |
| N2-Acetyl-L-ornithine                        | 175.11 | 1.64 | C <sub>7</sub> H <sub>14</sub> N <sub>2</sub> O <sub>3</sub>  | Carboxylic acids and derivatives    |
| 4-Guanidinobutanoic acid                     | 146.09 | 0.82 | C <sub>5</sub> H <sub>11</sub> N <sub>3</sub> O <sub>2</sub>  | Carboxylic acids and derivatives    |
| Acetylcholine                                | 146.12 | 0.82 | C <sub>7</sub> H <sub>15</sub> NO <sub>2</sub>                | Organonitrogen compounds            |

|                                                    |        |      |                                                               |                                     |
|----------------------------------------------------|--------|------|---------------------------------------------------------------|-------------------------------------|
| Porphobilinogen                                    | 227.10 | 2.15 | C <sub>10</sub> H <sub>14</sub> N <sub>2</sub> O <sub>4</sub> | Organonitrogen compounds            |
| Glycyl-Phenylalanine                               | 223.11 | 3.38 | C <sub>11</sub> H <sub>14</sub> N <sub>2</sub> O <sub>3</sub> | Carboxylic acids and derivatives    |
| Salicylic acid                                     | 137.02 | 3.50 | C <sub>7</sub> H <sub>6</sub> O <sub>3</sub>                  | Benzene and substituted derivatives |
| 9,12,13-trihydroxy-10,15-octadecadienoic acid      | 329.23 | 6.75 | C <sub>18</sub> H <sub>32</sub> O <sub>5</sub>                | Fatty Acyls                         |
| Canavanine                                         | 177.10 | 0.89 | C <sub>5</sub> H <sub>12</sub> N <sub>4</sub> O <sub>3</sub>  | Carboxylic acids and derivatives    |
| Asparaginy-Phenylalanine                           | 280.13 | 3.31 | C <sub>13</sub> H <sub>17</sub> N <sub>3</sub> O <sub>4</sub> | Carboxylic acids and derivatives    |
| DHAP(10:0)                                         | 325.14 | 3.95 | C <sub>13</sub> H <sub>25</sub> O <sub>7</sub> P              | Organooxygen compounds              |
| Ononin                                             | 431.13 | 4.86 | C <sub>22</sub> H <sub>22</sub> O <sub>9</sub>                | Isoflavonoids                       |
| 7-hexadecynoic acid                                | 275.20 | 6.22 | C <sub>16</sub> H <sub>28</sub> O <sub>2</sub>                | Fatty Acyls                         |
| Phytosphingosine                                   | 318.30 | 8.17 | C <sub>18</sub> H <sub>39</sub> NO <sub>3</sub>               | Organonitrogen compounds            |
| ESCULETIN                                          | 177.02 | 3.80 | C <sub>9</sub> H <sub>6</sub> O <sub>4</sub>                  | Coumarins and derivatives           |
| 6-Undecynoic acid                                  | 165.13 | 5.96 | C <sub>11</sub> H <sub>18</sub> O <sub>2</sub>                | Fatty Acyls                         |
| dexpanthenol                                       | 206.14 | 2.41 | C <sub>9</sub> H <sub>19</sub> NO <sub>4</sub>                | Fatty Acyls                         |
| Caffeate                                           | 163.04 | 3.11 | C <sub>9</sub> H <sub>8</sub> O <sub>4</sub>                  | Cinnamic acids and derivatives      |
| alpha-Ionone                                       | 193.16 | 5.99 | C <sub>13</sub> H <sub>20</sub> O                             | Prenol lipids                       |
| Dulcitol                                           | 181.07 | 0.75 | C <sub>6</sub> H <sub>14</sub> O <sub>6</sub>                 | Organooxygen compounds              |
| Baicalein                                          | 269.05 | 6.01 | C <sub>15</sub> H <sub>10</sub> O <sub>5</sub>                | Flavonoids                          |
| 5-L-Glutamyl-L-alanine                             | 219.10 | 1.06 | C <sub>8</sub> H <sub>14</sub> N <sub>2</sub> O <sub>5</sub>  | Carboxylic acids and derivatives    |
| Eremopetasinorone A                                | 207.14 | 4.34 | C <sub>13</sub> H <sub>18</sub> O <sub>2</sub>                | Organooxygen compounds              |
| 9S,12S,13S-trihydroxy-10E,15Z-octadecadienoic acid | 329.23 | 6.12 | C <sub>18</sub> H <sub>32</sub> O <sub>5</sub>                | Fatty Acyls                         |
| 6E,8E,14E-Hexadecatriene-10,12-diyneic acid        | 243.14 | 6.41 | C <sub>16</sub> H <sub>18</sub> O <sub>2</sub>                | Fatty Acyls                         |
| Adipic acid                                        | 145.05 | 3.05 | C <sub>6</sub> H <sub>10</sub> O <sub>4</sub>                 | Fatty Acyls                         |
| 1-Phenylethyl formate                              | 151.08 | 4.15 | C <sub>9</sub> H <sub>10</sub> O <sub>2</sub>                 | Benzene and substituted derivatives |
| Helinorbisabone                                    | 251.13 | 5.32 | C <sub>14</sub> H <sub>18</sub> O <sub>4</sub>                | Prenol lipids                       |
| 13(S)-HpODE                                        | 311.22 | 7.00 | C <sub>18</sub> H <sub>32</sub> O <sub>4</sub>                | Fatty Acyls                         |
| Indole-3-acetamide                                 | 175.09 | 3.27 | C <sub>10</sub> H <sub>10</sub> N <sub>2</sub> O              | Indoles and derivatives             |
| Tyrosyl-Isoleucine                                 | 295.17 | 3.77 | C <sub>15</sub> H <sub>22</sub> N <sub>2</sub> O <sub>4</sub> | Carboxylic acids and derivatives    |

|                                                      |        |      |                                                               |                                     |
|------------------------------------------------------|--------|------|---------------------------------------------------------------|-------------------------------------|
| 5,8,12-trihydroxy-9-octadecenoic acid                | 331.25 | 5.64 | C <sub>18</sub> H <sub>34</sub> O <sub>5</sub>                | Fatty Acyls                         |
| Uric acid                                            | 167.02 | 0.82 | C <sub>5</sub> H <sub>4</sub> N <sub>4</sub> O <sub>3</sub>   | Imidazopyrimidines                  |
| 3-Hydroxyphenyl-valeric acid                         | 195.10 | 4.84 | C <sub>11</sub> H <sub>14</sub> O <sub>3</sub>                | Fatty Acyls                         |
| Perillic acid                                        | 167.11 | 5.11 | C <sub>10</sub> H <sub>14</sub> O <sub>2</sub>                | Prenol lipids                       |
| Ethyl 4-methylphenoxyacetate                         | 195.10 | 8.19 | C <sub>11</sub> H <sub>14</sub> O <sub>3</sub>                | Benzene and substituted derivatives |
| Guanine                                              | 152.06 | 1.07 | C <sub>5</sub> H <sub>5</sub> N <sub>5</sub> O                | Imidazopyrimidines                  |
| 4,4alpha,5,6-Tetrahydro-7-methyl-2(3H)-naphthalenone | 163.11 | 5.46 | C <sub>11</sub> H <sub>14</sub> O                             | Organooxygen compounds              |
| LysoPC(18:1(11Z))                                    | 522.36 | 9.60 | C <sub>26</sub> H <sub>52</sub> NO <sub>7</sub> P             | Glycerophospholipids                |
| 3-amino-octanoic acid                                | 160.13 | 3.77 | C <sub>8</sub> H <sub>17</sub> NO <sub>2</sub>                | Fatty Acyls                         |
| 3,4-Dihydroxybenzoic acid                            | 153.02 | 4.10 | C <sub>7</sub> H <sub>6</sub> O <sub>4</sub>                  | Benzene and substituted derivatives |
| Valyl-Valine                                         | 217.15 | 1.73 | C <sub>10</sub> H <sub>20</sub> N <sub>2</sub> O <sub>3</sub> | Carboxylic acids and derivatives    |
| 8-Hydroxy-5,6-octadienoic acid                       | 157.09 | 3.07 | C <sub>8</sub> H <sub>12</sub> O <sub>3</sub>                 | Hydroxy acids and derivatives       |
| (-)-Jasmonic acid                                    | 211.13 | 4.34 | C <sub>12</sub> H <sub>18</sub> O <sub>3</sub>                | Fatty Acyls                         |
| capsidiol                                            | 219.17 | 5.22 | C <sub>15</sub> H <sub>24</sub> O <sub>2</sub>                | Prenol lipids                       |
| Glutaryl-glycine                                     | 190.07 | 1.22 | C <sub>7</sub> H <sub>11</sub> NO <sub>5</sub>                | Carboxylic acids and derivatives    |
| 8-Hydroxy-7-methoxy-2H-1-benzopyran-2-one            | 193.05 | 4.10 | C <sub>10</sub> H <sub>8</sub> O <sub>4</sub>                 | Coumarins and derivatives           |
| O-propanoyl-carnitine                                | 218.14 | 1.04 | C <sub>10</sub> H <sub>19</sub> NO <sub>4</sub>               | Fatty Acyls                         |
| SerinyI-Isoleucine                                   | 219.13 | 2.04 | C <sub>9</sub> H <sub>18</sub> N <sub>2</sub> O <sub>4</sub>  | Carboxylic acids and derivatives    |
| 2-Descarboxy-cyclo-dopa                              | 152.07 | 3.12 | C <sub>8</sub> H <sub>9</sub> NO <sub>2</sub>                 | Indoles and derivatives             |
| Pyridoxamine                                         | 169.10 | 1.78 | C <sub>8</sub> H <sub>12</sub> N <sub>2</sub> O <sub>2</sub>  | Pyridines and derivatives           |
| Metanephrene                                         | 198.11 | 3.57 | C <sub>10</sub> H <sub>15</sub> NO <sub>3</sub>               | Phenols                             |
| Gluconic acid                                        | 195.05 | 0.76 | C <sub>6</sub> H <sub>12</sub> O <sub>7</sub>                 | Organooxygen compounds              |
| 2,8-Dihydroxyadenine                                 | 168.05 | 1.03 | C <sub>5</sub> H <sub>5</sub> N <sub>5</sub> O <sub>2</sub>   | Imidazopyrimidines                  |
| Plantagonine                                         | 178.09 | 2.05 | C <sub>10</sub> H <sub>11</sub> NO <sub>2</sub>               | Pyridines and derivatives           |
| Isopetasoside                                        | 397.22 | 4.49 | C <sub>21</sub> H <sub>32</sub> O <sub>7</sub>                | Prenol lipids                       |
| (±)-Camphoric acid                                   | 201.11 | 4.56 | C <sub>10</sub> H <sub>16</sub> O <sub>4</sub>                | Carboxylic acids and derivatives    |
| 1,3,5,11-Bisabolatetraen-10-one                      | 217.16 | 6.87 | C <sub>15</sub> H <sub>20</sub> O                             | Prenol lipids                       |
| Ng-L-Glutamyl-L-aspartic acid                        | 263.09 | 1.04 | C <sub>9</sub> H <sub>14</sub> N <sub>2</sub> O <sub>7</sub>  | Carboxylic acids and derivatives    |
| alpha-Hydroxy-1-methyl-1H-indole-3-propanoic acid    | 220.10 | 4.43 | C <sub>12</sub> H <sub>13</sub> NO <sub>3</sub>               | Indoles and derivatives             |
| Sphinganine                                          | 302.31 | 8.09 | C <sub>18</sub> H <sub>39</sub> NO <sub>2</sub>               | Organonitrogen                      |

|                                                                 |        |       |                                                               |                                     |
|-----------------------------------------------------------------|--------|-------|---------------------------------------------------------------|-------------------------------------|
|                                                                 |        |       |                                                               | compounds                           |
| 5-Acetamidovalerate                                             | 160.10 | 2.04  | C <sub>7</sub> H <sub>13</sub> NO <sub>3</sub>                | Fatty Acyls                         |
| 1,6,9-Farnesatriene-3,11-diol                                   | 239.20 | 5.27  | C <sub>15</sub> H <sub>26</sub> O <sub>2</sub>                | Prenol lipids                       |
| 15-Octadecene-9,11,13-triynoic acid                             | 231.14 | 9.22  | C <sub>15</sub> H <sub>18</sub> O <sub>2</sub>                | Fatty Acyls                         |
| 3alpha,7alpha,12alpha,23R-tetrahydroxy-5beta-cholan-24-oic acid | 425.29 | 9.30  | C <sub>24</sub> H <sub>40</sub> O <sub>6</sub>                | Sterol Lipids                       |
| Histidinyl-Proline                                              | 253.13 | 2.56  | C <sub>11</sub> H <sub>16</sub> N <sub>4</sub> O <sub>3</sub> | Carboxylic acids and derivatives    |
| 16-iodo-hexadecanoic acid                                       | 383.14 | 3.95  | C <sub>16</sub> H <sub>31</sub> IO <sub>2</sub>               | Fatty Acyls                         |
| Spectinomycin                                                   | 333.17 | 4.05  | C <sub>14</sub> H <sub>24</sub> N <sub>2</sub> O <sub>7</sub> | Dioxanes                            |
| Indole-3-ethanol                                                | 162.09 | 4.88  | C <sub>10</sub> H <sub>11</sub> NO                            | Indoles and derivatives             |
| Isoleucyl-Valine                                                | 231.17 | 3.07  | C <sub>11</sub> H <sub>22</sub> N <sub>2</sub> O <sub>3</sub> | Carboxylic acids and derivatives    |
| Glycerophosphocholine                                           | 258.11 | 0.78  | C <sub>8</sub> H <sub>20</sub> NO <sub>6</sub> P              | Glycerophospholipids                |
| Alanyl-Leucine                                                  | 203.14 | 0.82  | C <sub>9</sub> H <sub>18</sub> N <sub>2</sub> O <sub>3</sub>  | Carboxylic acids and derivatives    |
| 7-methyl-3-oxooctanoic acid                                     | 173.12 | 6.14  | C <sub>9</sub> H <sub>16</sub> O <sub>3</sub>                 | Fatty Acyls                         |
| alpha-curcumen                                                  | 405.35 | 8.01  | C <sub>15</sub> H <sub>22</sub>                               | Prenol lipids                       |
| 9,10,13-Trihydroxystearic acid                                  | 333.26 | 5.89  | C <sub>18</sub> H <sub>36</sub> O <sub>5</sub>                | Fatty Acyls                         |
| DG(18:4(6Z,9Z,12Z,15Z)/18:3(6Z,9Z,12Z)/0:0)                     | 611.47 | 10.71 | C <sub>39</sub> H <sub>62</sub> O <sub>5</sub>                | Fatty Acyls                         |
| Dyphylline                                                      | 255.11 | 2.07  | C <sub>10</sub> H <sub>14</sub> N <sub>4</sub> O <sub>4</sub> | Imidazopyrimidines                  |
| Syringic acid                                                   | 199.06 | 3.05  | C <sub>9</sub> H <sub>10</sub> O <sub>5</sub>                 | Benzene and substituted derivatives |
| Genistein                                                       | 271.06 | 5.51  | C <sub>15</sub> H <sub>10</sub> O <sub>5</sub>                | Isoflavonoids                       |
| ANETHOLE                                                        | 149.10 | 8.09  | C <sub>10</sub> H <sub>12</sub> O                             | Benzene and substituted derivatives |
| 2,3-Dihydroxy-1-(4-hydroxy-3-methoxyphenyl)-1-propanone         | 213.08 | 3.14  | C <sub>10</sub> H <sub>12</sub> O <sub>5</sub>                | Organooxygen compounds              |
| Alpha-N-Phenylacetyl-L-glutamine                                | 265.12 | 3.83  | C <sub>13</sub> H <sub>16</sub> N <sub>2</sub> O <sub>4</sub> | Carboxylic acids and derivatives    |
| 2',4',4'-Trihydroxy-3'-prenylchalcone 4'-O-glucoside            | 487.19 | 3.80  | C <sub>26</sub> H <sub>30</sub> O <sub>9</sub>                | Polyketides                         |
| L-isoleucyl-L-proline                                           | 229.15 | 2.72  | C <sub>11</sub> H <sub>20</sub> N <sub>2</sub> O <sub>3</sub> | Carboxylic acids and derivatives    |
| 5-Methylquinoxaline                                             | 145.08 | 3.86  | C <sub>9</sub> H <sub>8</sub> N <sub>2</sub>                  | Naphthyridines                      |
| Folinic acid                                                    | 474.17 | 3.19  | C <sub>20</sub> H <sub>23</sub> N <sub>7</sub> O <sub>7</sub> | Pteridines and derivatives          |
| MG(18:4(6Z,9Z,12Z,15Z)/0:0/0:0)                                 | 351.25 | 6.55  | C <sub>21</sub> H <sub>34</sub> O <sub>4</sub>                | Fatty Acyls                         |

|                                                              |        |       |                                                               |                                     |
|--------------------------------------------------------------|--------|-------|---------------------------------------------------------------|-------------------------------------|
| 2-Carboxy-4-dodecanolide                                     | 243.16 | 7.44  | C <sub>13</sub> H <sub>22</sub> O <sub>4</sub>                | Lactones                            |
| Rosifoliol                                                   | 205.20 | 7.51  | C <sub>15</sub> H <sub>26</sub> O                             | Prenol lipids                       |
| 3-Oxochohic acid                                             | 407.28 | 8.93  | C <sub>24</sub> H <sub>38</sub> O <sub>5</sub>                | Steroids and steroid derivatives    |
| Ethyl N-ethylanthranilate                                    | 194.12 | 4.28  | C <sub>11</sub> H <sub>15</sub> NO <sub>2</sub>               | Benzene and substituted derivatives |
| 2-Hydroxyadenine                                             | 152.06 | 0.81  | C <sub>5</sub> H <sub>5</sub> N <sub>5</sub> O                | Imidazopyrimidines                  |
| Valyl-Proline                                                | 215.14 | 1.38  | C <sub>10</sub> H <sub>18</sub> N <sub>2</sub> O <sub>3</sub> | Carboxylic acids and derivatives    |
| Demethylvestitol                                             | 241.09 | 3.50  | C <sub>15</sub> H <sub>14</sub> O <sub>4</sub>                | Isoflavonoids                       |
| 2-[3-Carboxy-3-(methylammonio)propyl]-L-histidine            | 271.14 | 1.49  | C <sub>11</sub> H <sub>18</sub> N <sub>4</sub> O <sub>4</sub> | Carboxylic acids and derivatives    |
| (3beta,22R,23R,24S)-3,22,23-Trihydroxystigmastan-6-one       | 463.38 | 12.31 | C <sub>29</sub> H <sub>50</sub> O <sub>4</sub>                | Steroids and steroid derivatives    |
| butalbital                                                   | 225.12 | 3.60  | C <sub>11</sub> H <sub>16</sub> N <sub>2</sub> O <sub>3</sub> | Diazines                            |
| cis-3-Hexenyl pyruvate                                       | 171.10 | 4.49  | C <sub>9</sub> H <sub>14</sub> O <sub>3</sub>                 | Keto acids and derivatives          |
| Adenine                                                      | 136.06 | 0.81  | C <sub>5</sub> H <sub>5</sub> N <sub>5</sub>                  | Imidazopyrimidines                  |
| Procaterol                                                   | 291.17 | 4.37  | C <sub>16</sub> H <sub>22</sub> N <sub>2</sub> O <sub>3</sub> | Quinolines and derivatives          |
| 12-amino-dodecanoic acid                                     | 216.20 | 5.51  | C <sub>12</sub> H <sub>25</sub> NO <sub>2</sub>               | Fatty Acyls                         |
| Ethosuximide                                                 | 142.09 | 3.74  | C <sub>7</sub> H <sub>11</sub> NO <sub>2</sub>                | Pyrrolidines                        |
| Isoleucyl-Isoleucine                                         | 245.19 | 3.92  | C <sub>12</sub> H <sub>24</sub> N <sub>2</sub> O <sub>3</sub> | Carboxylic acids and derivatives    |
| MG(0:0/16:0/0:0)                                             | 313.27 | 9.15  | C <sub>19</sub> H <sub>38</sub> O <sub>4</sub>                | Glycerolipids                       |
| 3,6,9,12,15-octadecapentaenoic acid                          | 275.20 | 5.36  | C <sub>18</sub> H <sub>26</sub> O <sub>2</sub>                | Fatty Acyls                         |
| Ethyl levulinate                                             | 145.09 | 1.92  | C <sub>7</sub> H <sub>12</sub> O <sub>3</sub>                 | Keto acids and derivatives          |
| 2,2,4,4,-Tetramethyl-6-(1-oxopropyl)-1,3,5-cyclohexanetrione | 239.13 | 5.38  | C <sub>13</sub> H <sub>18</sub> O <sub>4</sub>                | Prenol lipids                       |
| 2-(Ethylamino)-4,5-dihydroxybenzamide                        | 197.09 | 3.29  | C <sub>9</sub> H <sub>12</sub> N <sub>2</sub> O <sub>3</sub>  | Benzene and substituted derivatives |
| Isoferuloyl C1-glucuronide                                   | 371.10 | 5.30  | C <sub>16</sub> H <sub>18</sub> O <sub>10</sub>               | Cinnamic acids and derivatives      |
| 9-hydroxy-16-oxo-hexadecanoic acid                           | 287.22 | 5.69  | C <sub>16</sub> H <sub>30</sub> O <sub>4</sub>                | Fatty Acyls                         |
| Suberylglycine                                               | 232.12 | 2.60  | C <sub>10</sub> H <sub>17</sub> NO <sub>5</sub>               | Carboxylic acids and derivatives    |
| Hydroxypropyl-Valine                                         | 231.13 | 3.92  | C <sub>10</sub> H <sub>18</sub> N <sub>2</sub> O <sub>4</sub> | Carboxylic acids and derivatives    |
| Succinylacetone                                              | 157.05 | 4.05  | C <sub>7</sub> H <sub>10</sub> O <sub>4</sub>                 | Keto acids and derivatives          |

|                                          |        |       |                                                               |                                     |
|------------------------------------------|--------|-------|---------------------------------------------------------------|-------------------------------------|
| 3Z,6Z,9Z,12Z,15Z-octadecapentaenoic acid | 275.20 | 7.10  | C <sub>18</sub> H <sub>26</sub> O <sub>2</sub>                | Fatty Acyls                         |
| Domoic acid                              | 312.14 | 1.61  | C <sub>15</sub> H <sub>21</sub> NO <sub>6</sub>               | Carboxylic acids and derivatives    |
| 8E,10E-dodecadienoic acid                | 197.15 | 4.66  | C <sub>12</sub> H <sub>20</sub> O <sub>2</sub>                | Fatty Acyls                         |
| Emodin                                   | 271.06 | 6.00  | C <sub>15</sub> H <sub>10</sub> O <sub>5</sub>                | Anthracenes                         |
| Nicotinate D-ribonucleoside              | 256.08 | 0.81  | C <sub>11</sub> H <sub>13</sub> NO <sub>6</sub>               | Organooxygen compounds              |
| Kinetin-9-N-glucoside                    | 378.14 | 3.64  | C <sub>16</sub> H <sub>19</sub> N <sub>5</sub> O <sub>6</sub> | Organooxygen compounds              |
| O-decanoyl-R-carnitine                   | 316.25 | 4.02  | C <sub>17</sub> H <sub>33</sub> NO <sub>4</sub>               | Fatty Acyls                         |
| 2,3-Dinor-6-keto-PGF1a                   | 341.20 | 7.64  | C <sub>18</sub> H <sub>28</sub> O <sub>6</sub>                | Fatty Acyls                         |
| Glutaminy-Lysine                         | 275.17 | 1.41  | C <sub>11</sub> H <sub>22</sub> N <sub>4</sub> O <sub>4</sub> | Carboxylic acids and derivatives    |
| Indoleacetaldehyde                       | 160.08 | 1.62  | C <sub>10</sub> H <sub>9</sub> NO                             | Indoles and derivatives             |
| Hypoxanthine                             | 137.05 | 0.83  | C <sub>5</sub> H <sub>4</sub> N <sub>4</sub> O                | Imidazopyrimidines                  |
| Isoleucyl-Alanine                        | 203.14 | 1.40  | C <sub>9</sub> H <sub>18</sub> N <sub>2</sub> O <sub>3</sub>  | Carboxylic acids and derivatives    |
| 3R-aminononanoic acid                    | 174.15 | 3.76  | C <sub>9</sub> H <sub>19</sub> NO <sub>2</sub>                | Fatty Acyls                         |
| 2-Hydroxymyristic Acid                   | 243.20 | 9.36  | C <sub>14</sub> H <sub>28</sub> O <sub>3</sub>                | Fatty Acyls                         |
| Tolmetin                                 | 258.11 | 5.32  | C <sub>15</sub> H <sub>15</sub> NO <sub>3</sub>               | Organooxygen compounds              |
| 6-Phosphogluconic acid                   | 275.02 | 0.79  | C <sub>6</sub> H <sub>13</sub> O <sub>10</sub> P              | Organooxygen compounds              |
| Phenylglyoxylic acid                     | 149.02 | 2.96  | C <sub>8</sub> H <sub>6</sub> O <sub>3</sub>                  | Benzene and substituted derivatives |
| 9,10-dihydroxy-Octadecanedioic acid      | 347.24 | 5.46  | C <sub>18</sub> H <sub>34</sub> O <sub>6</sub>                | Fatty Acyls                         |
| Glutaminy-Gamma-glutamate                | 275.13 | 0.82  | C <sub>10</sub> H <sub>18</sub> N <sub>4</sub> O <sub>5</sub> | Carboxylic acids and derivatives    |
| 4-Nitrocatechol                          | 154.01 | 3.21  | C <sub>6</sub> H <sub>5</sub> NO <sub>4</sub>                 | Phenols                             |
| 2'-Hydroxygenistein                      | 287.06 | 5.61  | C <sub>15</sub> H <sub>10</sub> O <sub>6</sub>                | Isoflavonoids                       |
| O-octanoyl-R-carnitine                   | 288.22 | 5.30  | C <sub>15</sub> H <sub>29</sub> NO <sub>4</sub>               | Fatty Acyls                         |
| GLYCYRRHIZIC ACID                        | 821.40 | 6.30  | C <sub>42</sub> H <sub>62</sub> O <sub>16</sub>               | Prenol lipids                       |
| Leucyl-Phenylalanine                     | 279.17 | 4.10  | C <sub>15</sub> H <sub>22</sub> N <sub>2</sub> O <sub>3</sub> | Carboxylic acids and derivatives    |
| Phosphohydroxypyruvic acid               | 184.99 | 10.69 | C <sub>3</sub> H <sub>5</sub> O <sub>7</sub> P                | Organooxygen compounds              |
| L-Octanoylcarnitine                      | 288.22 | 4.02  | C <sub>15</sub> H <sub>29</sub> NO <sub>4</sub>               | Fatty Acyls                         |
| PGJ2                                     | 357.20 | 4.80  | C <sub>20</sub> H <sub>30</sub> O <sub>4</sub>                | Fatty Acyls                         |
| Dictyoquinazol C                         | 343.13 | 5.14  | C <sub>18</sub> H <sub>18</sub> N <sub>2</sub> O <sub>5</sub> | Diazanaphthalenes                   |
| Enalapril                                | 377.20 | 3.57  | C <sub>20</sub> H <sub>28</sub> N <sub>2</sub> O <sub>5</sub> | Carboxylic acids and derivatives    |
| PA(18:3(9Z,12Z,15Z)/18:0)                | 699.49 | 11.32 | C <sub>39</sub> H <sub>71</sub> O <sub>8</sub> P              | Glycerophospholipids                |

|                |        |      |                                                                 |                                        |
|----------------|--------|------|-----------------------------------------------------------------|----------------------------------------|
| 15-Oxo-ETE     | 341.21 | 5.29 | C <sub>20</sub> H <sub>30</sub> O <sub>3</sub>                  | Fatty Acyls                            |
| Sulfinpyrazone | 403.11 | 4.41 | C <sub>23</sub> H <sub>20</sub> N <sub>2</sub> O <sub>3</sub> S | Benzene and substituted<br>derivatives |

---

**Supplementary Figure S1. The base peak chromatogram of positive and negative ion and the composition of the chemical metabolites.**

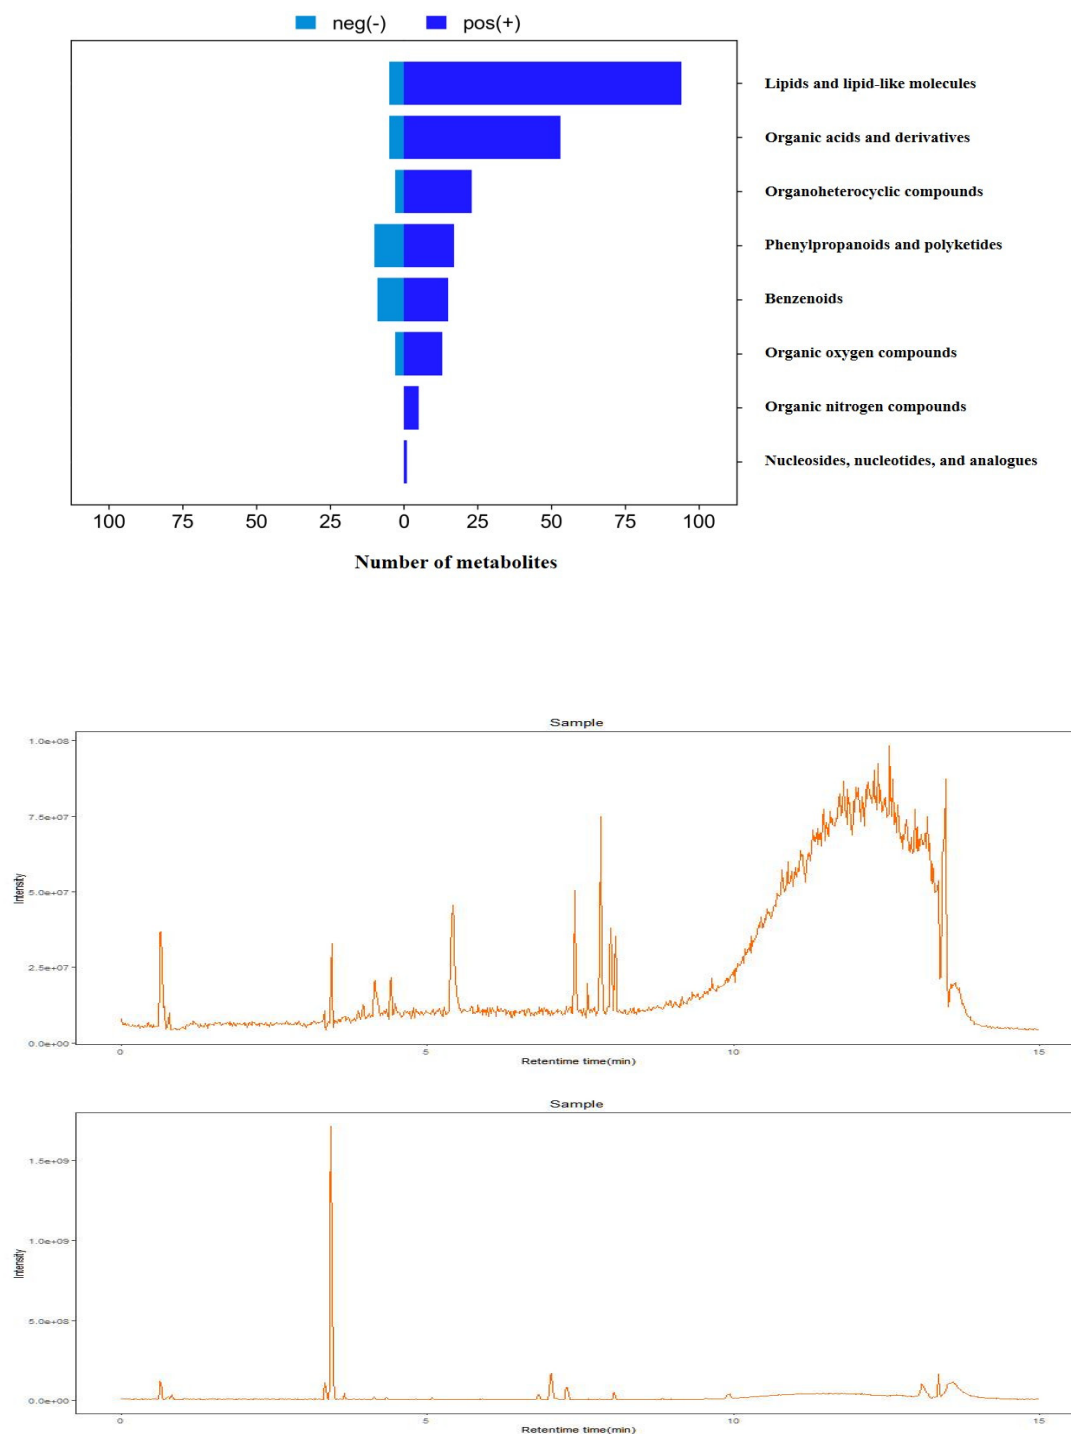

**Supplementary Figure S2. The common targets of ingredients and DM. The statistical bar chart of proteins with degree value greater than 12**

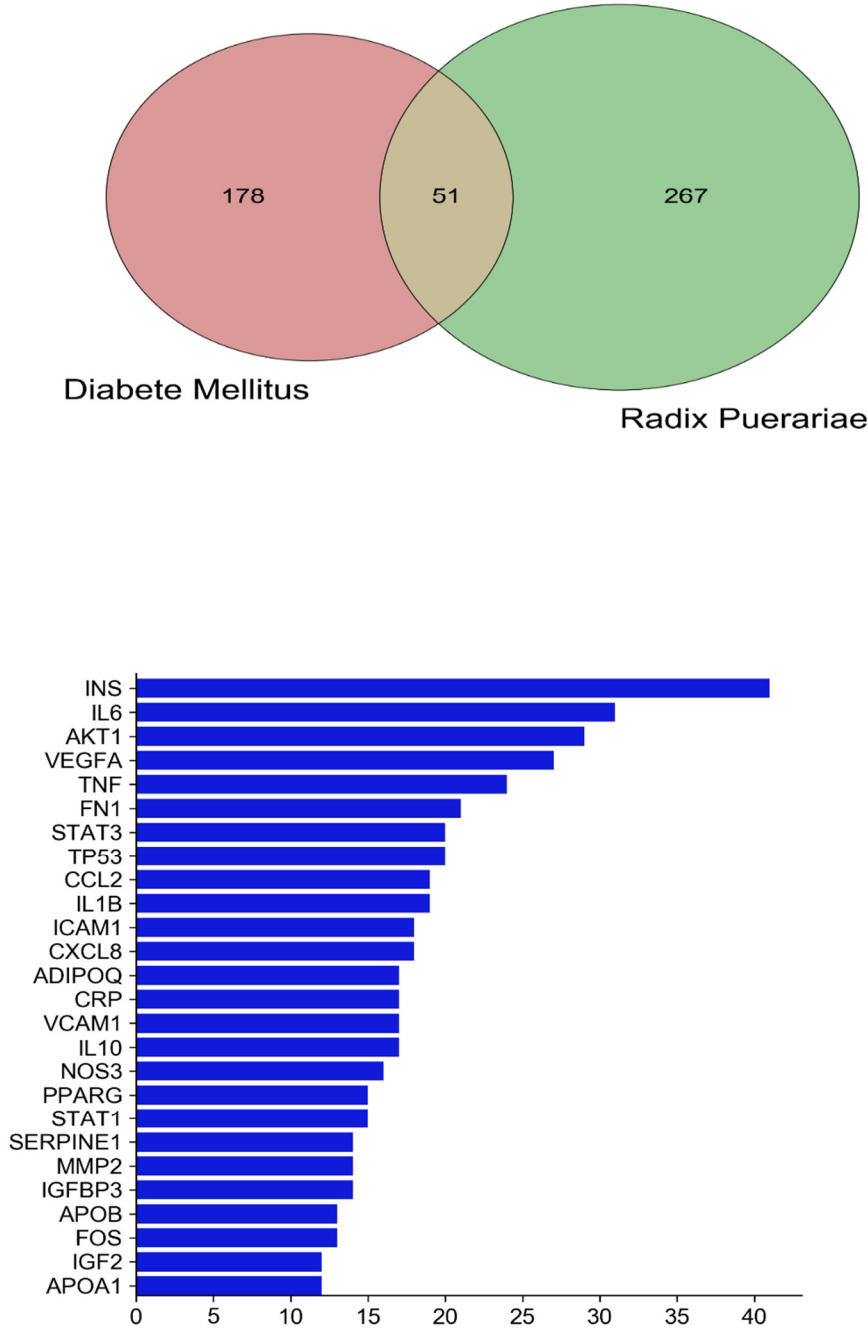

Supplement: s1 [file s1]
